# Supplementary material for: Yogurt Produced by Novel Natural Starter Cultures Improves Gut Epithelial Barrier In Vitro
Source: PubMed Central journal article supplement (PMC7602395; doi:10.3390/microorganisms8101586), 2020-10-15
Supplement: microorganisms-08-01586-s001.pdf [file microorganisms-08-01586-s001.pdf]

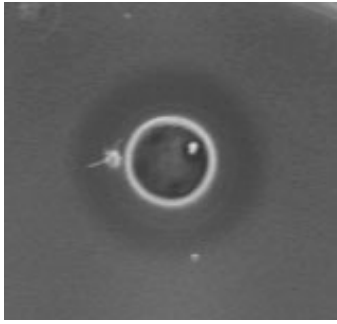

**Figure S1.** Inhibitory zone result of the non-proteinaceous compound activity against *Listeria monocytogenes* ATCC19111. To confirm the production of antimicrobial compounds of proteinaceous nature, crystals of pronase E were placed close to the edge of the wells.
